# Supplementary material
Source: publisher figshare collection journal article supplement (https://acs.figshare.com/ndownloader/files/5077897)
Supplement: Supplementary file 1 [file 5077897]

 
data_DTF3 
 
_audit_creation_method            SHELXL-97 
_chemical_name_systematic 
; 
 ? 
; 
_chemical_name_common             ? 
_chemical_melting_point           ? 
_chemical_formula_moiety          ? 
_chemical_formula_sum 
 'C43 H45 Cl2 Ti' 
_chemical_formula_weight          680.59 
 
loop_ 
 _atom_type_symbol 
 _atom_type_description 
 _atom_type_scat_dispersion_real 
 _atom_type_scat_dispersion_imag 
 _atom_type_scat_source 
 'C'  'C'   0.0033   0.0016 
 'International Tables Vol C Tables 4.2.6.8 and 6.1.1.4' 
 'H'  'H'   0.0000   0.0000 
 'International Tables Vol C Tables 4.2.6.8 and 6.1.1.4' 
 'Cl'  'Cl'   0.1484   0.1585 
 'International Tables Vol C Tables 4.2.6.8 and 6.1.1.4' 
 'Ti'  'Ti'   0.2776   0.4457 
 'International Tables Vol C Tables 4.2.6.8 and 6.1.1.4' 
 
_symmetry_cell_setting            triclinic 
_symmetry_space_group_name_H-M    P-1 
 
loop_ 
 _symmetry_equiv_pos_as_xyz 
 'x, y, z' 
 '-x, -y, -z' 
 
_cell_length_a                    10.8634(5) 
_cell_length_b                    11.7578(5) 
_cell_length_c                    16.4825(9) 
_cell_angle_alpha                 71.487(5) 
_cell_angle_beta                  81.618(6) 
_cell_angle_gamma                 63.231(5) 
_cell_volume                      1782.40(15) 
_cell_formula_units_Z             2 
_cell_measurement_temperature     193(2) 
_cell_measurement_reflns_used     ? 
_cell_measurement_theta_min       ? 
_cell_measurement_theta_max       ? 
 
_exptl_crystal_description        needle 
_exptl_crystal_colour             red
_exptl_crystal_size_max           1.00 
_exptl_crystal_size_mid           0.37 
_exptl_crystal_size_min           0.21 
_exptl_crystal_density_meas       ? 
_exptl_crystal_density_diffrn     1.268 
_exptl_crystal_density_method     'not measured' 
_exptl_crystal_F_000              718 
_exptl_absorpt_coefficient_mu     0.419 
_exptl_absorpt_correction_type    none 
_exptl_absorpt_correction_T_min   0.6554 
_exptl_absorpt_correction_T_max   0.9171 
_exptl_absorpt_process_details    ? 
 
_exptl_special_details 
; 
 ? 
; 
 
_diffrn_ambient_temperature       193(2) 
_diffrn_radiation_wavelength      0.71073 
_diffrn_radiation_type            MoK\a 
_diffrn_radiation_source          'fine-focus sealed tube' 
_diffrn_radiation_monochromator   graphite 
_diffrn_measurement_device_type   'Stoe IPDS'
_diffrn_measurement_method        ? 
_diffrn_detector_area_resol_mean  ? 
_diffrn_standards_number          ? 
_diffrn_standards_interval_count  ? 
_diffrn_standards_interval_time   ? 
_diffrn_standards_decay_%         ? 
_diffrn_reflns_number             21874 
_diffrn_reflns_av_R_equivalents   0.0423 
_diffrn_reflns_av_sigmaI/netI     0.0409 
_diffrn_reflns_limit_h_min        -13 
_diffrn_reflns_limit_h_max        13 
_diffrn_reflns_limit_k_min        -13 
_diffrn_reflns_limit_k_max        13 
_diffrn_reflns_limit_l_min        -20 
_diffrn_reflns_limit_l_max        20 
_diffrn_reflns_theta_min          2.20 
_diffrn_reflns_theta_max          25.91 
_reflns_number_total              6474 
_reflns_number_gt                 4953 
_reflns_threshold_expression      >2sigma(I) 
 
_computing_data_collection        'IPDS (Stoe, 1999)'
_computing_cell_refinement        'IPDS (Stoe, 1999)'
_computing_data_reduction         'XRED (Stoe, 1997)'
_computing_structure_solution     'SHELXS-97 (Sheldrick, 1990)' 
_computing_structure_refinement   'SHELXL-97 (Sheldrick, 1997)' 
_computing_molecular_graphics     'Ortep-3 for Windows (Farrugia, 1997)'
_computing_publication_material   'SHELX-97 (Sheldrick, 1997)'
 
_refine_special_details 
; 
 Refinement of F^2^ against ALL reflections.  The weighted R-factor wR and 
 goodness of fit S are based on F^2^, conventional R-factors R are based 
 on F, with F set to zero for negative F^2^. The threshold expression of 
 F^2^ > 2sigma(F^2^) is used only for calculating R-factors(gt) etc. and is 
 not relevant to the choice of reflections for refinement.  R-factors based 
 on F^2^ are statistically about twice as large as those based on F, and R- 
 factors based on ALL data will be even larger. 
; 
 
_refine_ls_structure_factor_coef  Fsqd  
_refine_ls_matrix_type            full 
_refine_ls_weighting_scheme       calc  
_refine_ls_weighting_details 
 'calc w=1/[\s^2^(Fo^2^)+(0.0447P)^2^+0.0000P] where P=(Fo^2^+2Fc^2^)/3' 
_atom_sites_solution_primary      direct 
_atom_sites_solution_secondary    difmap 
_atom_sites_solution_hydrogens    geom 
_refine_ls_hydrogen_treatment     constr 
_refine_ls_extinction_method      none 
_refine_ls_extinction_coef        ? 
_refine_ls_number_reflns          6474 
_refine_ls_number_parameters      415 
_refine_ls_number_restraints      0 
_refine_ls_R_factor_all           0.0427 
_refine_ls_R_factor_gt            0.0285 
_refine_ls_wR_factor_ref          0.0728 
_refine_ls_wR_factor_gt           0.0691 
_refine_ls_goodness_of_fit_ref    0.943 
_refine_ls_restrained_S_all       0.943 
_refine_ls_shift/su_max           0.001 
_refine_ls_shift/su_mean          0.000 
 
loop_ 
 _atom_site_label 
 _atom_site_type_symbol 
 _atom_site_fract_x 
 _atom_site_fract_y 
 _atom_site_fract_z 
 _atom_site_U_iso_or_equiv 
 _atom_site_adp_type 
 _atom_site_occupancy 
 _atom_site_symmetry_multiplicity 
 _atom_site_calc_flag 
 _atom_site_refinement_flags 
 _atom_site_disorder_assembly 
 _atom_site_disorder_group 
Ti1 Ti 0.69932(3) 0.39371(3) 0.863274(17) 0.02163(8) Uani 1 1 d . . . 
Cl1 Cl 0.70308(4) 0.49404(4) 0.96502(3) 0.03606(11) Uani 1 1 d . . . 
Cl2 Cl 0.90602(4) 0.38979(4) 0.79651(3) 0.03085(10) Uani 1 1 d . . . 
C1 C 0.58482(14) 0.62336(15) 0.77393(10) 0.0237(3) Uani 1 1 d . . . 
C2 C 0.62395(15) 0.53853(15) 0.72109(10) 0.0256(3) Uani 1 1 d . . . 
H2 H 0.6871 0.5370 0.6746 0.031 Uiso 1 1 calc R . . 
C3 C 0.55473(16) 0.45708(17) 0.74819(11) 0.0295(4) Uani 1 1 d . . . 
H3 H 0.5631 0.3907 0.7239 0.035 Uiso 1 1 calc R . . 
C4 C 0.47021(15) 0.49173(17) 0.81832(12) 0.0320(4) Uani 1 1 d . . . 
H4 H 0.4113 0.4527 0.8496 0.038 Uiso 1 1 calc R . . 
C5 C 0.48848(14) 0.59332(16) 0.83360(11) 0.0282(4) Uani 1 1 d . . . 
H5 H 0.4435 0.6355 0.8771 0.034 Uiso 1 1 calc R . . 
C6 C 0.64168(14) 0.72003(15) 0.77151(10) 0.0238(3) Uani 1 1 d . . . 
H6 H 0.7223 0.6698 0.8112 0.029 Uiso 1 1 calc R . . 
C7 C 0.54086(15) 0.83586(15) 0.80495(10) 0.0242(3) Uani 1 1 d . . . 
C8 C 0.40596(17) 0.91318(19) 0.77623(12) 0.0397(4) Uani 1 1 d . . . 
H8 H 0.3711 0.8895 0.7377 0.048 Uiso 1 1 calc R . . 
C9 C 0.32185(18) 1.02428(19) 0.80304(13) 0.0445(5) Uani 1 1 d . . . 
H9 H 0.2298 1.0754 0.7826 0.053 Uiso 1 1 calc R . . 
C10 C 0.36800(17) 1.06288(17) 0.85854(11) 0.0340(4) Uani 1 1 d . . . 
C11 C 0.50121(17) 0.98429(17) 0.88838(11) 0.0318(4) Uani 1 1 d . . . 
H11 H 0.5355 1.0076 0.9274 0.038 Uiso 1 1 calc R . . 
C12 C 0.58575(16) 0.87215(17) 0.86252(10) 0.0277(3) Uani 1 1 d . . . 
H12 H 0.6765 0.8192 0.8849 0.033 Uiso 1 1 calc R . . 
C13 C 0.2783(2) 1.1864(2) 0.88560(14) 0.0500(5) Uani 1 1 d . . . 
H13A H 0.3095 1.1775 0.9411 0.060 Uiso 1 1 calc R . . 
H13B H 0.1824 1.1985 0.8905 0.060 Uiso 1 1 calc R . . 
H13C H 0.2845 1.2636 0.8429 0.060 Uiso 1 1 calc R . . 
C14 C 0.69607(15) 0.77295(15) 0.68447(10) 0.0256(3) Uani 1 1 d . . . 
C15 C 0.62243(17) 0.82213(18) 0.60953(11) 0.0348(4) Uani 1 1 d . . . 
H15 H 0.5372 0.8171 0.6110 0.042 Uiso 1 1 calc R . . 
C16 C 0.67137(19) 0.87851(19) 0.53249(11) 0.0407(4) Uani 1 1 d . . . 
H16 H 0.6194 0.9109 0.4818 0.049 Uiso 1 1 calc R . . 
C17 C 0.79385(19) 0.88845(19) 0.52798(12) 0.0412(5) Uani 1 1 d . . . 
C18 C 0.86759(19) 0.8384(2) 0.60235(13) 0.0445(5) Uani 1 1 d . . . 
H18 H 0.9528 0.8434 0.6007 0.053 Uiso 1 1 calc R . . 
C19 C 0.82031(17) 0.78103(19) 0.67945(11) 0.0357(4) Uani 1 1 d . . . 
H19 H 0.8738 0.7467 0.7297 0.043 Uiso 1 1 calc R . . 
C20 C 0.8446(2) 0.9533(2) 0.44430(14) 0.0616(7) Uani 1 1 d . . . 
H20A H 0.9445 0.9221 0.4471 0.074 Uiso 1 1 calc R . . 
H20B H 0.7990 1.0500 0.4337 0.074 Uiso 1 1 calc R . . 
H20C H 0.8233 0.9300 0.3977 0.074 Uiso 1 1 calc R . . 
C21 C 0.80375(15) 0.16246(15) 0.86715(10) 0.0246(3) Uani 1 1 d . . . 
C22 C 0.86007(17) 0.16987(16) 0.93669(10) 0.0300(4) Uani 1 1 d . . . 
H22 H 0.9543 0.1482 0.9429 0.036 Uiso 1 1 calc R . . 
C23 C 0.75472(18) 0.21408(17) 0.99447(11) 0.0354(4) Uani 1 1 d . . . 
H23 H 0.7651 0.2255 1.0472 0.043 Uiso 1 1 calc R . . 
C24 C 0.63108(18) 0.23869(17) 0.96093(11) 0.0350(4) Uani 1 1 d . . . 
H24 H 0.5422 0.2728 0.9859 0.042 Uiso 1 1 calc R . . 
C25 C 0.66169(16) 0.20372(16) 0.88306(11) 0.0292(4) Uani 1 1 d . . . 
H25 H 0.5973 0.2076 0.8478 0.035 Uiso 1 1 calc R . . 
C26 C 0.88777(15) 0.10647(15) 0.79600(10) 0.0244(3) Uani 1 1 d . . . 
H26 H 0.9650 0.1338 0.7826 0.029 Uiso 1 1 calc R . . 
C27 C 0.95217(14) -0.04505(15) 0.82429(10) 0.0242(3) Uani 1 1 d . . . 
C28 C 0.90835(16) -0.11873(16) 0.89542(10) 0.0306(4) Uani 1 1 d . . . 
H28 H 0.8420 -0.0749 0.9328 0.037 Uiso 1 1 calc R . . 
C29 C 0.95947(16) -0.25500(17) 0.91300(11) 0.0335(4) Uani 1 1 d . . . 
H29 H 0.9283 -0.3031 0.9627 0.040 Uiso 1 1 calc R . . 
C30 C 1.05521(15) -0.32313(16) 0.85979(11) 0.0299(4) Uani 1 1 d . . . 
C31 C 1.10428(16) -0.25016(17) 0.79130(11) 0.0339(4) Uani 1 1 d . . . 
H31 H 1.1742 -0.2946 0.7557 0.041 Uiso 1 1 calc R . . 
C32 C 1.05368(16) -0.11413(17) 0.77371(11) 0.0312(4) Uani 1 1 d . . . 
H32 H 1.0891 -0.0668 0.7260 0.037 Uiso 1 1 calc R . . 
C33 C 1.10002(19) -0.46871(18) 0.87475(13) 0.0419(4) Uani 1 1 d . . . 
H33A H 1.0187 -0.4858 0.8787 0.050 Uiso 1 1 calc R . . 
H33B H 1.1523 -0.5186 0.9282 0.050 Uiso 1 1 calc R . . 
H33C H 1.1584 -0.4969 0.8271 0.050 Uiso 1 1 calc R . . 
C34 C 0.80610(15) 0.15995(15) 0.71397(10) 0.0255(3) Uani 1 1 d . . . 
C35 C 0.71241(17) 0.11446(17) 0.70546(11) 0.0340(4) Uani 1 1 d . . . 
H35 H 0.7003 0.0469 0.7512 0.041 Uiso 1 1 calc R . . 
C36 C 0.63631(19) 0.1657(2) 0.63154(13) 0.0429(5) Uani 1 1 d . . . 
H36 H 0.5725 0.1330 0.6275 0.051 Uiso 1 1 calc R . . 
C37 C 0.65144(19) 0.2641(2) 0.56321(12) 0.0424(5) Uani 1 1 d . . . 
C38 C 0.74613(19) 0.30830(19) 0.57160(11) 0.0400(4) Uani 1 1 d . . . 
H38 H 0.7593 0.3749 0.5254 0.048 Uiso 1 1 calc R . . 
C39 C 0.82222(16) 0.25778(17) 0.64577(10) 0.0308(4) Uani 1 1 d . . . 
H39 H 0.8860 0.2905 0.6499 0.037 Uiso 1 1 calc R . . 
C40 C 0.5700(3) 0.3189(3) 0.48193(15) 0.0644(7) Uani 1 1 d . . . 
H40A H 0.6249 0.2712 0.4405 0.077 Uiso 1 1 calc R . . 
H40B H 0.5475 0.4136 0.4579 0.077 Uiso 1 1 calc R . . 
H40C H 0.4846 0.3074 0.4946 0.077 Uiso 1 1 calc R . . 
C41 C 0.9782(3) 0.4897(3) 0.46292(18) 0.0736(8) Uani 1 1 d . . . 
H41A H 1.0505 0.4840 0.4182 0.088 Uiso 1 1 calc R . . 
H41B H 0.9728 0.4033 0.4821 0.088 Uiso 1 1 calc R . . 
C42 C 0.8437(3) 0.5948(3) 0.4239(2) 0.0891(9) Uani 1 1 d . . . 
H42A H 0.8514 0.6801 0.4012 0.107 Uiso 1 1 calc R . . 
H42B H 0.7728 0.6049 0.4695 0.107 Uiso 1 1 calc R . . 
C43 C 0.7945(4) 0.5707(4) 0.3532(2) 0.1107(13) Uani 1 1 d . . . 
H43A H 0.7063 0.6455 0.3314 0.166 Uiso 1 1 calc R . . 
H43B H 0.7822 0.4886 0.3752 0.166 Uiso 1 1 calc R . . 
H43C H 0.8627 0.5623 0.3068 0.166 Uiso 1 1 calc R . . 
 
loop_ 
 _atom_site_aniso_label 
 _atom_site_aniso_U_11 
 _atom_site_aniso_U_22 
 _atom_site_aniso_U_33 
 _atom_site_aniso_U_23 
 _atom_site_aniso_U_13 
 _atom_site_aniso_U_12 
Ti1 0.02482(14) 0.01788(15) 0.02194(14) -0.00546(10) -0.00096(10) -0.00888(11) 
Cl1 0.0523(2) 0.0276(2) 0.0279(2) -0.00941(16) -0.00873(17) -0.01333(18) 
Cl2 0.02563(18) 0.0277(2) 0.0385(2) -0.00625(17) -0.00019(15) -0.01297(15) 
C1 0.0236(7) 0.0186(8) 0.0248(8) -0.0042(6) -0.0055(6) -0.0054(6) 
C2 0.0292(7) 0.0211(8) 0.0230(8) -0.0047(6) -0.0067(6) -0.0071(6) 
C3 0.0313(8) 0.0223(9) 0.0359(9) -0.0086(7) -0.0104(7) -0.0092(6) 
C4 0.0237(7) 0.0257(9) 0.0456(10) -0.0070(7) -0.0032(7) -0.0109(6) 
C5 0.0219(7) 0.0227(9) 0.0351(9) -0.0092(7) -0.0010(6) -0.0046(6) 
C6 0.0252(7) 0.0199(8) 0.0252(8) -0.0060(6) -0.0038(6) -0.0079(6) 
C7 0.0285(7) 0.0187(8) 0.0249(8) -0.0049(6) 0.0000(6) -0.0105(6) 
C8 0.0355(9) 0.0358(11) 0.0468(11) -0.0204(8) -0.0115(8) -0.0055(8) 
C9 0.0324(9) 0.0344(11) 0.0547(12) -0.0166(9) -0.0094(8) 0.0010(8) 
C10 0.0417(9) 0.0220(9) 0.0333(9) -0.0080(7) 0.0077(7) -0.0117(7) 
C11 0.0411(9) 0.0297(9) 0.0306(9) -0.0116(7) 0.0046(7) -0.0199(7) 
C12 0.0288(8) 0.0267(9) 0.0291(8) -0.0072(7) 0.0005(6) -0.0139(6) 
C13 0.0572(12) 0.0309(11) 0.0479(12) -0.0165(9) 0.0078(9) -0.0059(9) 
C14 0.0272(7) 0.0185(8) 0.0277(8) -0.0069(6) -0.0006(6) -0.0066(6) 
C15 0.0331(8) 0.0362(10) 0.0309(9) -0.0045(7) -0.0038(7) -0.0138(7) 
C16 0.0425(10) 0.0377(11) 0.0291(9) -0.0036(8) -0.0023(7) -0.0096(8) 
C17 0.0439(10) 0.0308(10) 0.0370(10) -0.0069(8) 0.0113(8) -0.0112(8) 
C18 0.0369(9) 0.0527(13) 0.0451(11) -0.0113(9) 0.0084(8) -0.0246(9) 
C19 0.0333(8) 0.0402(11) 0.0342(9) -0.0097(8) -0.0012(7) -0.0165(7) 
C20 0.0636(13) 0.0551(14) 0.0462(12) -0.0033(10) 0.0179(10) -0.0213(11) 
C21 0.0321(8) 0.0133(7) 0.0254(8) -0.0021(6) -0.0016(6) -0.0091(6) 
C22 0.0388(9) 0.0195(8) 0.0261(8) -0.0022(6) -0.0050(7) -0.0093(7) 
C23 0.0547(10) 0.0225(9) 0.0220(8) -0.0018(7) 0.0008(7) -0.0139(8) 
C24 0.0452(10) 0.0241(9) 0.0340(9) -0.0081(7) 0.0143(7) -0.0178(7) 
C25 0.0345(8) 0.0194(8) 0.0350(9) -0.0062(7) 0.0042(7) -0.0147(7) 
C26 0.0265(7) 0.0199(8) 0.0267(8) -0.0063(6) 0.0012(6) -0.0104(6) 
C27 0.0243(7) 0.0193(8) 0.0273(8) -0.0057(6) -0.0038(6) -0.0074(6) 
C28 0.0321(8) 0.0230(9) 0.0301(8) -0.0049(7) 0.0017(6) -0.0086(7) 
C29 0.0341(8) 0.0239(9) 0.0353(9) -0.0008(7) -0.0022(7) -0.0108(7) 
C30 0.0288(8) 0.0201(9) 0.0397(9) -0.0066(7) -0.0147(7) -0.0065(6) 
C31 0.0299(8) 0.0283(9) 0.0387(10) -0.0155(8) -0.0020(7) -0.0039(7) 
C32 0.0307(8) 0.0262(9) 0.0317(9) -0.0066(7) 0.0027(6) -0.0099(7) 
C33 0.0435(10) 0.0236(9) 0.0560(12) -0.0100(8) -0.0173(8) -0.0083(8) 
C34 0.0296(8) 0.0178(8) 0.0261(8) -0.0082(6) 0.0009(6) -0.0066(6) 
C35 0.0419(9) 0.0249(9) 0.0365(9) -0.0071(7) -0.0051(7) -0.0153(7) 
C36 0.0480(10) 0.0365(11) 0.0514(12) -0.0167(9) -0.0123(9) -0.0180(8) 
C37 0.0488(10) 0.0363(11) 0.0364(10) -0.0130(8) -0.0124(8) -0.0080(8) 
C38 0.0495(10) 0.0346(10) 0.0259(9) -0.0018(7) -0.0025(7) -0.0135(8) 
C39 0.0342(8) 0.0282(9) 0.0284(9) -0.0074(7) 0.0019(7) -0.0131(7) 
C40 0.0756(15) 0.0640(16) 0.0488(13) -0.0129(11) -0.0287(11) -0.0197(12) 
C41 0.0776(17) 0.0687(17) 0.087(2) -0.0358(15) 0.0320(15) -0.0421(14) 
C42 0.091(2) 0.079(2) 0.100(2) -0.0263(18) 0.0194(18) -0.0448(17) 
C43 0.135(3) 0.157(4) 0.0635(19) -0.024(2) 0.0256(19) -0.096(3) 
 
_geom_special_details 
; 
 All esds (except the esd in the dihedral angle between two l.s. planes) 
 are estimated using the full covariance matrix.  The cell esds are taken 
 into account individually in the estimation of esds in distances, angles 
 and torsion angles; correlations between esds in cell parameters are only 
 used when they are defined by crystal symmetry.  An approximate (isotropic) 
 treatment of cell esds is used for estimating esds involving l.s. planes. 
; 
 
loop_ 
 _geom_bond_atom_site_label_1 
 _geom_bond_atom_site_label_2 
 _geom_bond_distance 
 _geom_bond_site_symmetry_2 
 _geom_bond_publ_flag 
Ti1 C24 2.3386(17) . ? 
Ti1 Cl2 2.3397(5) . ? 
Ti1 C4 2.3416(15) . ? 
Ti1 Cl1 2.3506(5) . ? 
Ti1 C3 2.3532(16) . ? 
Ti1 C25 2.3632(17) . ? 
Ti1 C5 2.3977(15) . ? 
Ti1 C21 2.4117(16) . ? 
Ti1 C23 2.4152(16) . ? 
Ti1 C2 2.4149(15) . ? 
Ti1 C22 2.4279(16) . ? 
Ti1 C1 2.4475(15) . ? 
C1 C2 1.413(2) . ? 
C1 C5 1.414(2) . ? 
C1 C6 1.507(2) . ? 
C2 C3 1.401(2) . ? 
C3 C4 1.413(2) . ? 
C4 C5 1.396(3) . ? 
C6 C14 1.520(2) . ? 
C6 C7 1.522(2) . ? 
C7 C12 1.378(2) . ? 
C7 C8 1.388(2) . ? 
C8 C9 1.382(3) . ? 
C9 C10 1.377(3) . ? 
C10 C11 1.380(2) . ? 
C10 C13 1.506(2) . ? 
C11 C12 1.384(2) . ? 
C14 C19 1.384(2) . ? 
C14 C15 1.385(2) . ? 
C15 C16 1.386(2) . ? 
C16 C17 1.377(3) . ? 
C17 C18 1.376(3) . ? 
C17 C20 1.509(3) . ? 
C18 C19 1.383(3) . ? 
C21 C25 1.405(2) . ? 
C21 C22 1.418(2) . ? 
C21 C26 1.510(2) . ? 
C22 C23 1.396(2) . ? 
C23 C24 1.399(3) . ? 
C24 C25 1.419(3) . ? 
C26 C34 1.522(2) . ? 
C26 C27 1.525(2) . ? 
C27 C28 1.384(2) . ? 
C27 C32 1.388(2) . ? 
C28 C29 1.382(2) . ? 
C29 C30 1.386(2) . ? 
C30 C31 1.384(3) . ? 
C30 C33 1.498(2) . ? 
C31 C32 1.380(2) . ? 
C34 C35 1.386(2) . ? 
C34 C39 1.386(2) . ? 
C35 C36 1.382(3) . ? 
C36 C37 1.387(3) . ? 
C37 C38 1.384(3) . ? 
C37 C40 1.509(3) . ? 
C38 C39 1.386(2) . ? 
C41 C42 1.490(4) . ? 
C41 C41 1.495(6) 2_766 ? 
C42 C43 1.500(5) . ? 
 
loop_ 
 _geom_angle_atom_site_label_1 
 _geom_angle_atom_site_label_2 
 _geom_angle_atom_site_label_3 
 _geom_angle 
 _geom_angle_site_symmetry_1 
 _geom_angle_site_symmetry_3 
 _geom_angle_publ_flag 
C24 Ti1 Cl2 135.77(5) . . ? 
C24 Ti1 C4 82.40(6) . . ? 
Cl2 Ti1 C4 134.57(5) . . ? 
C24 Ti1 Cl1 94.67(5) . . ? 
Cl2 Ti1 Cl1 95.323(19) . . ? 
C4 Ti1 Cl1 106.49(5) . . ? 
C24 Ti1 C3 99.32(7) . . ? 
Cl2 Ti1 C3 103.55(4) . . ? 
C4 Ti1 C3 35.04(6) . . ? 
Cl1 Ti1 C3 134.78(4) . . ? 
C24 Ti1 C25 35.13(6) . . ? 
Cl2 Ti1 C25 116.61(4) . . ? 
C4 Ti1 C25 78.92(6) . . ? 
Cl1 Ti1 C25 129.43(4) . . ? 
C3 Ti1 C25 76.87(6) . . ? 
C24 Ti1 C5 103.12(6) . . ? 
Cl2 Ti1 C5 121.10(4) . . ? 
C4 Ti1 C5 34.23(6) . . ? 
Cl1 Ti1 C5 77.87(4) . . ? 
C3 Ti1 C5 57.14(6) . . ? 
C25 Ti1 C5 111.57(6) . . ? 
C24 Ti1 C21 57.54(5) . . ? 
Cl2 Ti1 C21 83.72(4) . . ? 
C4 Ti1 C21 109.13(6) . . ? 
Cl1 Ti1 C21 130.05(4) . . ? 
C3 Ti1 C21 93.03(6) . . ? 
C25 Ti1 C21 34.21(5) . . ? 
C5 Ti1 C21 143.35(6) . . ? 
C24 Ti1 C23 34.19(7) . . ? 
Cl2 Ti1 C23 108.17(5) . . ? 
C4 Ti1 C23 115.28(6) . . ? 
Cl1 Ti1 C23 76.91(5) . . ? 
C3 Ti1 C23 131.99(6) . . ? 
C25 Ti1 C23 57.01(6) . . ? 
C5 Ti1 C23 126.00(6) . . ? 
C21 Ti1 C23 56.66(6) . . ? 
C24 Ti1 C2 133.36(6) . . ? 
Cl2 Ti1 C2 77.69(4) . . ? 
C4 Ti1 C2 56.96(6) . . ? 
Cl1 Ti1 C2 116.63(4) . . ? 
C3 Ti1 C2 34.13(6) . . ? 
C25 Ti1 C2 108.21(6) . . ? 
C5 Ti1 C2 56.14(5) . . ? 
C21 Ti1 C2 111.91(5) . . ? 
C23 Ti1 C2 165.22(6) . . ? 
C24 Ti1 C22 56.56(6) . . ? 
Cl2 Ti1 C22 79.54(4) . . ? 
C4 Ti1 C22 134.51(6) . . ? 
Cl1 Ti1 C22 96.42(4) . . ? 
C3 Ti1 C22 127.02(6) . . ? 
C25 Ti1 C22 56.49(6) . . ? 
C5 Ti1 C22 158.76(6) . . ? 
C21 Ti1 C22 34.08(5) . . ? 
C23 Ti1 C22 33.49(6) . . ? 
C2 Ti1 C22 141.15(5) . . ? 
C24 Ti1 C1 136.48(6) . . ? 
Cl2 Ti1 C1 87.45(4) . . ? 
C4 Ti1 C1 57.01(6) . . ? 
Cl1 Ti1 C1 83.75(4) . . ? 
C3 Ti1 C1 56.99(6) . . ? 
C25 Ti1 C1 132.35(6) . . ? 
C5 Ti1 C1 33.92(5) . . ? 
C21 Ti1 C1 145.64(5) . . ? 
C23 Ti1 C1 156.01(6) . . ? 
C2 Ti1 C1 33.77(5) . . ? 
C22 Ti1 C1 166.95(5) . . ? 
C2 C1 C5 106.48(14) . . ? 
C2 C1 C6 126.91(13) . . ? 
C5 C1 C6 126.48(14) . . ? 
C2 C1 Ti1 71.85(8) . . ? 
C5 C1 Ti1 71.11(9) . . ? 
C6 C1 Ti1 118.90(9) . . ? 
C3 C2 C1 109.10(14) . . ? 
C3 C2 Ti1 70.52(9) . . ? 
C1 C2 Ti1 74.38(9) . . ? 
C2 C3 C4 107.47(15) . . ? 
C2 C3 Ti1 75.35(9) . . ? 
C4 C3 Ti1 72.03(9) . . ? 
C5 C4 C3 107.97(15) . . ? 
C5 C4 Ti1 75.08(9) . . ? 
C3 C4 Ti1 72.93(9) . . ? 
C4 C5 C1 108.97(15) . . ? 
C4 C5 Ti1 70.68(9) . . ? 
C1 C5 Ti1 74.97(8) . . ? 
C1 C6 C14 114.40(13) . . ? 
C1 C6 C7 113.25(12) . . ? 
C14 C6 C7 109.44(13) . . ? 
C12 C7 C8 117.54(15) . . ? 
C12 C7 C6 119.45(13) . . ? 
C8 C7 C6 122.89(15) . . ? 
C9 C8 C7 120.74(17) . . ? 
C10 C9 C8 121.72(16) . . ? 
C11 C10 C9 117.41(15) . . ? 
C11 C10 C13 120.70(17) . . ? 
C9 C10 C13 121.89(17) . . ? 
C10 C11 C12 121.26(16) . . ? 
C7 C12 C11 121.28(15) . . ? 
C19 C14 C15 117.70(15) . . ? 
C19 C14 C6 119.30(14) . . ? 
C15 C14 C6 122.86(14) . . ? 
C14 C15 C16 120.89(16) . . ? 
C17 C16 C15 121.25(17) . . ? 
C18 C17 C16 117.81(16) . . ? 
C18 C17 C20 121.22(19) . . ? 
C16 C17 C20 120.96(19) . . ? 
C17 C18 C19 121.44(17) . . ? 
C18 C19 C14 120.89(17) . . ? 
C25 C21 C22 106.89(14) . . ? 
C25 C21 C26 128.32(15) . . ? 
C22 C21 C26 124.51(14) . . ? 
C25 C21 Ti1 71.01(9) . . ? 
C22 C21 Ti1 73.58(9) . . ? 
C26 C21 Ti1 125.42(10) . . ? 
C23 C22 C21 108.99(15) . . ? 
C23 C22 Ti1 72.76(9) . . ? 
C21 C22 Ti1 72.34(9) . . ? 
C22 C23 C24 107.88(16) . . ? 
C22 C23 Ti1 73.75(9) . . ? 
C24 C23 Ti1 69.90(9) . . ? 
C23 C24 C25 108.03(14) . . ? 
C23 C24 Ti1 75.90(10) . . ? 
C25 C24 Ti1 73.38(9) . . ? 
C21 C25 C24 108.16(15) . . ? 
C21 C25 Ti1 74.79(9) . . ? 
C24 C25 Ti1 71.49(10) . . ? 
C21 C26 C34 113.16(12) . . ? 
C21 C26 C27 111.22(12) . . ? 
C34 C26 C27 110.21(13) . . ? 
C28 C27 C32 117.32(15) . . ? 
C28 C27 C26 123.40(13) . . ? 
C32 C27 C26 119.13(14) . . ? 
C29 C28 C27 121.13(15) . . ? 
C28 C29 C30 121.50(16) . . ? 
C31 C30 C29 117.15(16) . . ? 
C31 C30 C33 121.73(16) . . ? 
C29 C30 C33 121.09(16) . . ? 
C32 C31 C30 121.34(15) . . ? 
C31 C32 C27 121.36(15) . . ? 
C35 C34 C39 118.02(15) . . ? 
C35 C34 C26 121.48(14) . . ? 
C39 C34 C26 120.48(15) . . ? 
C36 C35 C34 121.13(17) . . ? 
C35 C36 C37 121.15(18) . . ? 
C38 C37 C36 117.55(17) . . ? 
C38 C37 C40 121.17(19) . . ? 
C36 C37 C40 121.3(2) . . ? 
C37 C38 C39 121.57(17) . . ? 
C38 C39 C34 120.57(17) . . ? 
C42 C41 C41 115.3(3) . 2_766 ? 
C41 C42 C43 115.7(3) . . ? 
 
loop_ 
 _geom_torsion_atom_site_label_1 
 _geom_torsion_atom_site_label_2 
 _geom_torsion_atom_site_label_3 
 _geom_torsion_atom_site_label_4 
 _geom_torsion 
 _geom_torsion_site_symmetry_1 
 _geom_torsion_site_symmetry_2 
 _geom_torsion_site_symmetry_3 
 _geom_torsion_site_symmetry_4 
 _geom_torsion_publ_flag 
C24 Ti1 C1 C2 -102.64(11) . . . . ? 
Cl2 Ti1 C1 C2 71.51(8) . . . . ? 
C4 Ti1 C1 C2 -78.54(10) . . . . ? 
Cl1 Ti1 C1 C2 167.15(9) . . . . ? 
C3 Ti1 C1 C2 -36.47(9) . . . . ? 
C25 Ti1 C1 C2 -52.96(11) . . . . ? 
C5 Ti1 C1 C2 -115.32(14) . . . . ? 
C21 Ti1 C1 C2 -3.47(14) . . . . ? 
C23 Ti1 C1 C2 -156.62(14) . . . . ? 
C22 Ti1 C1 C2 75.7(3) . . . . ? 
C24 Ti1 C1 C5 12.68(14) . . . . ? 
Cl2 Ti1 C1 C5 -173.17(10) . . . . ? 
C4 Ti1 C1 C5 36.78(10) . . . . ? 
Cl1 Ti1 C1 C5 -77.53(9) . . . . ? 
C3 Ti1 C1 C5 78.86(10) . . . . ? 
C25 Ti1 C1 C5 62.36(12) . . . . ? 
C21 Ti1 C1 C5 111.85(12) . . . . ? 
C23 Ti1 C1 C5 -41.30(19) . . . . ? 
C2 Ti1 C1 C5 115.32(14) . . . . ? 
C22 Ti1 C1 C5 -169.0(2) . . . . ? 
C24 Ti1 C1 C6 134.61(11) . . . . ? 
Cl2 Ti1 C1 C6 -51.24(10) . . . . ? 
C4 Ti1 C1 C6 158.71(13) . . . . ? 
Cl1 Ti1 C1 C6 44.40(10) . . . . ? 
C3 Ti1 C1 C6 -159.22(13) . . . . ? 
C25 Ti1 C1 C6 -175.72(10) . . . . ? 
C5 Ti1 C1 C6 121.93(16) . . . . ? 
C21 Ti1 C1 C6 -126.22(12) . . . . ? 
C23 Ti1 C1 C6 80.62(18) . . . . ? 
C2 Ti1 C1 C6 -122.75(15) . . . . ? 
C22 Ti1 C1 C6 -47.1(3) . . . . ? 
C5 C1 C2 C3 -0.71(16) . . . . ? 
C6 C1 C2 C3 175.34(14) . . . . ? 
Ti1 C1 C2 C3 62.40(10) . . . . ? 
C5 C1 C2 Ti1 -63.11(10) . . . . ? 
C6 C1 C2 Ti1 112.94(14) . . . . ? 
C24 Ti1 C2 C3 -4.88(13) . . . . ? 
Cl2 Ti1 C2 C3 138.52(9) . . . . ? 
C4 Ti1 C2 C3 -38.64(10) . . . . ? 
Cl1 Ti1 C2 C3 -131.66(9) . . . . ? 
C25 Ti1 C2 C3 24.26(10) . . . . ? 
C5 Ti1 C2 C3 -79.94(10) . . . . ? 
C21 Ti1 C2 C3 60.55(10) . . . . ? 
C23 Ti1 C2 C3 23.4(3) . . . . ? 
C22 Ti1 C2 C3 83.06(12) . . . . ? 
C1 Ti1 C2 C3 -117.34(13) . . . . ? 
C24 Ti1 C2 C1 112.47(10) . . . . ? 
Cl2 Ti1 C2 C1 -104.14(9) . . . . ? 
C4 Ti1 C2 C1 78.70(10) . . . . ? 
Cl1 Ti1 C2 C1 -14.32(10) . . . . ? 
C3 Ti1 C2 C1 117.34(13) . . . . ? 
C25 Ti1 C2 C1 141.61(9) . . . . ? 
C5 Ti1 C2 C1 37.40(9) . . . . ? 
C21 Ti1 C2 C1 177.89(8) . . . . ? 
C23 Ti1 C2 C1 140.8(2) . . . . ? 
C22 Ti1 C2 C1 -159.60(9) . . . . ? 
C1 C2 C3 C4 0.52(17) . . . . ? 
Ti1 C2 C3 C4 65.38(11) . . . . ? 
C1 C2 C3 Ti1 -64.87(10) . . . . ? 
C24 Ti1 C3 C2 176.41(9) . . . . ? 
Cl2 Ti1 C3 C2 -41.73(9) . . . . ? 
C4 Ti1 C3 C2 114.27(14) . . . . ? 
Cl1 Ti1 C3 C2 70.20(11) . . . . ? 
C25 Ti1 C3 C2 -156.37(10) . . . . ? 
C5 Ti1 C3 C2 76.75(10) . . . . ? 
C21 Ti1 C3 C2 -126.00(9) . . . . ? 
C23 Ti1 C3 C2 -172.15(9) . . . . ? 
C22 Ti1 C3 C2 -128.75(9) . . . . ? 
C1 Ti1 C3 C2 36.07(9) . . . . ? 
C24 Ti1 C3 C4 62.14(11) . . . . ? 
Cl2 Ti1 C3 C4 -156.00(9) . . . . ? 
Cl1 Ti1 C3 C4 -44.07(12) . . . . ? 
C25 Ti1 C3 C4 89.36(10) . . . . ? 
C5 Ti1 C3 C4 -37.52(10) . . . . ? 
C21 Ti1 C3 C4 119.73(10) . . . . ? 
C23 Ti1 C3 C4 73.58(12) . . . . ? 
C2 Ti1 C3 C4 -114.27(14) . . . . ? 
C22 Ti1 C3 C4 116.99(10) . . . . ? 
C1 Ti1 C3 C4 -78.19(10) . . . . ? 
C2 C3 C4 C5 -0.12(18) . . . . ? 
Ti1 C3 C4 C5 67.50(11) . . . . ? 
C2 C3 C4 Ti1 -67.61(11) . . . . ? 
C24 Ti1 C4 C5 127.09(11) . . . . ? 
Cl2 Ti1 C4 C5 -80.86(11) . . . . ? 
Cl1 Ti1 C4 C5 34.44(10) . . . . ? 
C3 Ti1 C4 C5 -114.57(15) . . . . ? 
C25 Ti1 C4 C5 162.54(11) . . . . ? 
C21 Ti1 C4 C5 178.82(9) . . . . ? 
C23 Ti1 C4 C5 117.47(10) . . . . ? 
C2 Ti1 C4 C5 -76.97(11) . . . . ? 
C22 Ti1 C4 C5 151.48(10) . . . . ? 
C1 Ti1 C4 C5 -36.43(9) . . . . ? 
C24 Ti1 C4 C3 -118.34(11) . . . . ? 
Cl2 Ti1 C4 C3 33.71(13) . . . . ? 
Cl1 Ti1 C4 C3 149.01(9) . . . . ? 
C25 Ti1 C4 C3 -82.89(10) . . . . ? 
C5 Ti1 C4 C3 114.57(15) . . . . ? 
C21 Ti1 C4 C3 -66.61(11) . . . . ? 
C23 Ti1 C4 C3 -127.96(10) . . . . ? 
C2 Ti1 C4 C3 37.60(10) . . . . ? 
C22 Ti1 C4 C3 -93.95(12) . . . . ? 
C1 Ti1 C4 C3 78.14(11) . . . . ? 
C3 C4 C5 C1 -0.33(18) . . . . ? 
Ti1 C4 C5 C1 65.73(11) . . . . ? 
C3 C4 C5 Ti1 -66.06(11) . . . . ? 
C2 C1 C5 C4 0.63(17) . . . . ? 
C6 C1 C5 C4 -175.44(14) . . . . ? 
Ti1 C1 C5 C4 -62.97(11) . . . . ? 
C2 C1 C5 Ti1 63.60(10) . . . . ? 
C6 C1 C5 Ti1 -112.47(14) . . . . ? 
C24 Ti1 C5 C4 -54.28(11) . . . . ? 
Cl2 Ti1 C5 C4 124.77(9) . . . . ? 
Cl1 Ti1 C5 C4 -146.31(10) . . . . ? 
C3 Ti1 C5 C4 38.43(10) . . . . ? 
C25 Ti1 C5 C4 -18.46(12) . . . . ? 
C21 Ti1 C5 C4 -1.87(15) . . . . ? 
C23 Ti1 C5 C4 -82.58(12) . . . . ? 
C2 Ti1 C5 C4 79.56(11) . . . . ? 
C22 Ti1 C5 C4 -70.0(2) . . . . ? 
C1 Ti1 C5 C4 116.79(15) . . . . ? 
C24 Ti1 C5 C1 -171.07(10) . . . . ? 
Cl2 Ti1 C5 C1 7.98(11) . . . . ? 
C4 Ti1 C5 C1 -116.79(15) . . . . ? 
Cl1 Ti1 C5 C1 96.89(9) . . . . ? 
C3 Ti1 C5 C1 -78.36(10) . . . . ? 
C25 Ti1 C5 C1 -135.25(10) . . . . ? 
C21 Ti1 C5 C1 -118.67(11) . . . . ? 
C23 Ti1 C5 C1 160.63(10) . . . . ? 
C2 Ti1 C5 C1 -37.23(9) . . . . ? 
C22 Ti1 C5 C1 173.17(14) . . . . ? 
C2 C1 C6 C14 27.7(2) . . . . ? 
C5 C1 C6 C14 -157.03(14) . . . . ? 
Ti1 C1 C6 C14 115.93(12) . . . . ? 
C2 C1 C6 C7 154.02(14) . . . . ? 
C5 C1 C6 C7 -30.7(2) . . . . ? 
Ti1 C1 C6 C7 -117.72(12) . . . . ? 
C1 C6 C7 C12 133.00(15) . . . . ? 
C14 C6 C7 C12 -98.06(16) . . . . ? 
C1 C6 C7 C8 -51.0(2) . . . . ? 
C14 C6 C7 C8 77.92(19) . . . . ? 
C12 C7 C8 C9 1.7(3) . . . . ? 
C6 C7 C8 C9 -174.38(17) . . . . ? 
C7 C8 C9 C10 0.3(3) . . . . ? 
C8 C9 C10 C11 -1.6(3) . . . . ? 
C8 C9 C10 C13 177.92(19) . . . . ? 
C9 C10 C11 C12 0.9(3) . . . . ? 
C13 C10 C11 C12 -178.55(17) . . . . ? 
C8 C7 C12 C11 -2.3(2) . . . . ? 
C6 C7 C12 C11 173.90(14) . . . . ? 
C10 C11 C12 C7 1.0(2) . . . . ? 
C1 C6 C14 C19 -136.13(16) . . . . ? 
C7 C6 C14 C19 95.57(17) . . . . ? 
C1 C6 C14 C15 48.2(2) . . . . ? 
C7 C6 C14 C15 -80.09(19) . . . . ? 
C19 C14 C15 C16 -0.6(3) . . . . ? 
C6 C14 C15 C16 175.13(16) . . . . ? 
C14 C15 C16 C17 -0.5(3) . . . . ? 
C15 C16 C17 C18 1.1(3) . . . . ? 
C15 C16 C17 C20 -178.32(19) . . . . ? 
C16 C17 C18 C19 -0.6(3) . . . . ? 
C20 C17 C18 C19 178.8(2) . . . . ? 
C17 C18 C19 C14 -0.5(3) . . . . ? 
C15 C14 C19 C18 1.1(3) . . . . ? 
C6 C14 C19 C18 -174.78(17) . . . . ? 
C24 Ti1 C21 C25 37.97(10) . . . . ? 
Cl2 Ti1 C21 C25 -164.45(9) . . . . ? 
C4 Ti1 C21 C25 -29.29(11) . . . . ? 
Cl1 Ti1 C21 C25 103.86(9) . . . . ? 
C3 Ti1 C21 C25 -61.15(10) . . . . ? 
C5 Ti1 C21 C25 -28.18(14) . . . . ? 
C23 Ti1 C21 C25 78.95(11) . . . . ? 
C2 Ti1 C21 C25 -90.44(10) . . . . ? 
C22 Ti1 C21 C25 114.94(13) . . . . ? 
C1 Ti1 C21 C25 -88.36(12) . . . . ? 
C24 Ti1 C21 C22 -76.97(10) . . . . ? 
Cl2 Ti1 C21 C22 80.61(9) . . . . ? 
C4 Ti1 C21 C22 -144.23(10) . . . . ? 
Cl1 Ti1 C21 C22 -11.08(11) . . . . ? 
C3 Ti1 C21 C22 -176.09(10) . . . . ? 
C25 Ti1 C21 C22 -114.94(13) . . . . ? 
C5 Ti1 C21 C22 -143.12(10) . . . . ? 
C23 Ti1 C21 C22 -36.00(10) . . . . ? 
C2 Ti1 C21 C22 154.62(9) . . . . ? 
C1 Ti1 C21 C22 156.70(10) . . . . ? 
C24 Ti1 C21 C26 162.02(16) . . . . ? 
Cl2 Ti1 C21 C26 -40.40(12) . . . . ? 
C4 Ti1 C21 C26 94.76(13) . . . . ? 
Cl1 Ti1 C21 C26 -132.09(11) . . . . ? 
C3 Ti1 C21 C26 62.90(13) . . . . ? 
C25 Ti1 C21 C26 124.05(17) . . . . ? 
C5 Ti1 C21 C26 95.87(15) . . . . ? 
C23 Ti1 C21 C26 -157.00(15) . . . . ? 
C2 Ti1 C21 C26 33.61(14) . . . . ? 
C22 Ti1 C21 C26 -121.01(17) . . . . ? 
C1 Ti1 C21 C26 35.69(18) . . . . ? 
C25 C21 C22 C23 0.35(18) . . . . ? 
C26 C21 C22 C23 -173.96(15) . . . . ? 
Ti1 C21 C22 C23 63.99(12) . . . . ? 
C25 C21 C22 Ti1 -63.64(11) . . . . ? 
C26 C21 C22 Ti1 122.05(15) . . . . ? 
C24 Ti1 C22 C23 -37.04(12) . . . . ? 
Cl2 Ti1 C22 C23 148.58(11) . . . . ? 
C4 Ti1 C22 C23 -66.42(14) . . . . ? 
Cl1 Ti1 C22 C23 54.33(11) . . . . ? 
C3 Ti1 C22 C23 -112.26(12) . . . . ? 
C25 Ti1 C22 C23 -79.47(12) . . . . ? 
C5 Ti1 C22 C23 -18.6(2) . . . . ? 
C21 Ti1 C22 C23 -117.16(15) . . . . ? 
C2 Ti1 C22 C23 -156.49(11) . . . . ? 
C1 Ti1 C22 C23 144.3(2) . . . . ? 
C24 Ti1 C22 C21 80.12(11) . . . . ? 
Cl2 Ti1 C22 C21 -94.26(9) . . . . ? 
C4 Ti1 C22 C21 50.74(12) . . . . ? 
Cl1 Ti1 C22 C21 171.48(8) . . . . ? 
C3 Ti1 C22 C21 4.90(12) . . . . ? 
C25 Ti1 C22 C21 37.69(9) . . . . ? 
C5 Ti1 C22 C21 98.59(17) . . . . ? 
C23 Ti1 C22 C21 117.16(15) . . . . ? 
C2 Ti1 C22 C21 -39.34(14) . . . . ? 
C1 Ti1 C22 C21 -98.5(3) . . . . ? 
C21 C22 C23 C24 -1.8(2) . . . . ? 
Ti1 C22 C23 C24 61.96(12) . . . . ? 
C21 C22 C23 Ti1 -63.72(12) . . . . ? 
C24 Ti1 C23 C22 116.56(16) . . . . ? 
Cl2 Ti1 C23 C22 -32.65(12) . . . . ? 
C4 Ti1 C23 C22 133.71(11) . . . . ? 
Cl1 Ti1 C23 C22 -124.02(11) . . . . ? 
C3 Ti1 C23 C22 96.18(12) . . . . ? 
C25 Ti1 C23 C22 77.78(11) . . . . ? 
C5 Ti1 C23 C22 171.80(10) . . . . ? 
C21 Ti1 C23 C22 36.64(10) . . . . ? 
C2 Ti1 C23 C22 78.7(2) . . . . ? 
C1 Ti1 C23 C22 -161.12(13) . . . . ? 
Cl2 Ti1 C23 C24 -149.21(9) . . . . ? 
C4 Ti1 C23 C24 17.15(13) . . . . ? 
Cl1 Ti1 C23 C24 119.41(10) . . . . ? 
C3 Ti1 C23 C24 -20.38(14) . . . . ? 
C25 Ti1 C23 C24 -38.79(10) . . . . ? 
C5 Ti1 C23 C24 55.24(13) . . . . ? 
C21 Ti1 C23 C24 -79.92(11) . . . . ? 
C2 Ti1 C23 C24 -37.9(3) . . . . ? 
C22 Ti1 C23 C24 -116.56(16) . . . . ? 
C1 Ti1 C23 C24 82.32(18) . . . . ? 
C22 C23 C24 C25 2.5(2) . . . . ? 
Ti1 C23 C24 C25 66.93(12) . . . . ? 
C22 C23 C24 Ti1 -64.46(12) . . . . ? 
Cl2 Ti1 C24 C23 44.21(13) . . . . ? 
C4 Ti1 C24 C23 -164.40(11) . . . . ? 
Cl1 Ti1 C24 C23 -58.35(10) . . . . ? 
C3 Ti1 C24 C23 164.79(10) . . . . ? 
C25 Ti1 C24 C23 114.08(14) . . . . ? 
C5 Ti1 C24 C23 -136.96(10) . . . . ? 
C21 Ti1 C24 C23 77.13(11) . . . . ? 
C2 Ti1 C24 C23 167.56(10) . . . . ? 
C22 Ti1 C24 C23 36.27(10) . . . . ? 
C1 Ti1 C24 C23 -144.19(10) . . . . ? 
Cl2 Ti1 C24 C25 -69.87(12) . . . . ? 
C4 Ti1 C24 C25 81.52(10) . . . . ? 
Cl1 Ti1 C24 C25 -172.43(9) . . . . ? 
C3 Ti1 C24 C25 50.72(11) . . . . ? 
C5 Ti1 C24 C25 108.96(10) . . . . ? 
C21 Ti1 C24 C25 -36.94(9) . . . . ? 
C23 Ti1 C24 C25 -114.08(14) . . . . ? 
C2 Ti1 C24 C25 53.49(13) . . . . ? 
C22 Ti1 C24 C25 -77.81(10) . . . . ? 
C1 Ti1 C24 C25 101.74(11) . . . . ? 
C22 C21 C25 C24 1.18(18) . . . . ? 
C26 C21 C25 C24 175.20(15) . . . . ? 
Ti1 C21 C25 C24 -64.19(12) . . . . ? 
C22 C21 C25 Ti1 65.36(11) . . . . ? 
C26 C21 C25 Ti1 -120.61(16) . . . . ? 
C23 C24 C25 C21 -2.27(19) . . . . ? 
Ti1 C24 C25 C21 66.36(11) . . . . ? 
C23 C24 C25 Ti1 -68.63(12) . . . . ? 
C24 Ti1 C25 C21 -115.57(14) . . . . ? 
Cl2 Ti1 C25 C21 17.34(10) . . . . ? 
C4 Ti1 C25 C21 151.90(10) . . . . ? 
Cl1 Ti1 C25 C21 -105.78(9) . . . . ? 
C3 Ti1 C25 C21 116.09(10) . . . . ? 
C5 Ti1 C25 C21 162.36(9) . . . . ? 
C23 Ti1 C25 C21 -77.85(10) . . . . ? 
C2 Ti1 C25 C21 102.40(10) . . . . ? 
C22 Ti1 C25 C21 -37.55(9) . . . . ? 
C1 Ti1 C25 C21 130.24(9) . . . . ? 
Cl2 Ti1 C25 C24 132.91(9) . . . . ? 
C4 Ti1 C25 C24 -92.53(11) . . . . ? 
Cl1 Ti1 C25 C24 9.79(12) . . . . ? 
C3 Ti1 C25 C24 -128.34(11) . . . . ? 
C5 Ti1 C25 C24 -82.08(11) . . . . ? 
C21 Ti1 C25 C24 115.57(14) . . . . ? 
C23 Ti1 C25 C24 37.71(10) . . . . ? 
C2 Ti1 C25 C24 -142.04(10) . . . . ? 
C22 Ti1 C25 C24 78.02(11) . . . . ? 
C1 Ti1 C25 C24 -114.19(11) . . . . ? 
C25 C21 C26 C34 30.9(2) . . . . ? 
C22 C21 C26 C34 -156.09(15) . . . . ? 
Ti1 C21 C26 C34 -62.19(17) . . . . ? 
C25 C21 C26 C27 -93.82(18) . . . . ? 
C22 C21 C26 C27 79.23(19) . . . . ? 
Ti1 C21 C26 C27 173.13(10) . . . . ? 
C21 C26 C27 C28 17.0(2) . . . . ? 
C34 C26 C27 C28 -109.36(17) . . . . ? 
C21 C26 C27 C32 -167.62(15) . . . . ? 
C34 C26 C27 C32 66.05(18) . . . . ? 
C32 C27 C28 C29 -2.8(2) . . . . ? 
C26 C27 C28 C29 172.69(15) . . . . ? 
C27 C28 C29 C30 -0.7(3) . . . . ? 
C28 C29 C30 C31 4.1(2) . . . . ? 
C28 C29 C30 C33 -174.18(16) . . . . ? 
C29 C30 C31 C32 -3.9(2) . . . . ? 
C33 C30 C31 C32 174.33(16) . . . . ? 
C30 C31 C32 C27 0.4(3) . . . . ? 
C28 C27 C32 C31 3.0(2) . . . . ? 
C26 C27 C32 C31 -172.72(15) . . . . ? 
C21 C26 C34 C35 -76.74(19) . . . . ? 
C27 C26 C34 C35 48.48(18) . . . . ? 
C21 C26 C34 C39 102.25(17) . . . . ? 
C27 C26 C34 C39 -132.53(15) . . . . ? 
C39 C34 C35 C36 -0.6(2) . . . . ? 
C26 C34 C35 C36 178.46(15) . . . . ? 
C34 C35 C36 C37 0.3(3) . . . . ? 
C35 C36 C37 C38 0.4(3) . . . . ? 
C35 C36 C37 C40 179.10(19) . . . . ? 
C36 C37 C38 C39 -0.8(3) . . . . ? 
C40 C37 C38 C39 -179.47(18) . . . . ? 
C37 C38 C39 C34 0.5(3) . . . . ? 
C35 C34 C39 C38 0.2(2) . . . . ? 
C26 C34 C39 C38 -178.83(14) . . . . ? 
C41 C41 C42 C43 -176.1(3) 2_766 . . . ? 
 
_diffrn_measured_fraction_theta_max    0.932 
_diffrn_reflns_theta_full              25.91 
_diffrn_measured_fraction_theta_full   0.932 
_refine_diff_density_max    0.256 
_refine_diff_density_min   -0.204 
_refine_diff_density_rms    0.039 
